# Supplementary material for: Analysis of Oxytetracycline and Penicillin G Levels in Milk and Dairy Producers' Knowledge, Attitudes, and Practices on Antibiotic Residues: Implications for Public Health in Jimma Town, Southwest Ethiopia
Source: Research Square preprint supplement (doi:10.21203/rs.3.rs-8146960/v1), 2025-12-17
Supplement: Supplementary file 1 [file f6d2612059d7b34f53ffa5c2.pdf]

## KAP Questionnaire

**Jimma University College of Agriculture and Veterinary Medicine, school of Veterinary  
Medicine**

### **Questionnaire:**

Respected respondent, hello!. Good morning or afternoon! Under the JUCAVM department of Veterinary Public Health, I am a Postgraduate student named Assefa Tayachew. Under the heading **"Knowledge, Attitude and Practices of dairy producers on antibiotic Residue Occurrence and Analysis of antibiotic Residue Levels in raw milk Produced in Jimma town, Oromia Regional State, Ethiopia"** I am currently working on my MSc. Thesis. My research aims to ascertain the level of awareness among milk producers regarding antibiotic residues in raw milk. Thus, you have been graciously chosen to take part in this title. You are asked to answer the questions honestly and candidly because the study is for academic purposes. I promise to keep your privacy. We won't use it in any papers or publications without your permission. I appreciate your willingness to take part in the research.

**Knowledge's, attitude and practice of dairy producers on antibiotic residue occurrence:**

Date \_\_\_\_\_ Respondents' Code \_\_\_\_\_

#### ***I. Socio-demographic information of dairy producers.***

1 kebeles of dairy farm

- a. A/Mendera      b. B/Adis      c. B/Bore      d. B/Keto

2. Gender of respondent

- a. Male      b. Female

3. Age of the respondent

- a. <15      b. 15-25      c. 25-45      d. > 45

4. Educational status

- a. Illiterate      b. elementary      c. Secondary or high school      d. college/ university graduate/above

5. Size of the dairy farm

a. 1-3 cattle b. 4-10 cattle c. >10 cattle

6. Experience in dairy farm ----- years

a. 1-5 years b. >5-10 years c. >10 -15 d. >15

Questions on Producer's Knowledge About antibiotic residue Occurrence

Yes No

Do you know the name of antibiotic you use in your dairy farm for treatment?

Have you ever heard the word AR?

Do you heard about withdrawal period?

Have you ever any information about the negative effects of antibiotic residue on human health?

## 2. Questions on producer's attitude on antibiotic residue occurrence

| Questions on producer's attitude on antibiotic residue occurrence                                                                         | Agree | Neutral | Disagree |
|-------------------------------------------------------------------------------------------------------------------------------------------|-------|---------|----------|
| Respecting the withdrawal periods of milk according to the veterinarian advice or manufacturers prescription is my part of responsibility |       |         |          |
| Milk from treated cow should neither use nor sell for consumer                                                                            |       |         |          |
| Milkier those who have not enough knowledge about milk safety or AR have to restrain from milking.                                        |       |         |          |
| Having training about the milk safety or antibiotic residue reduce the residual level                                                     |       |         |          |

## 3. Question Producer's Practice to Reducing the Occurrence of antibiotic Residue in milk

| Question                                                                                                | Always | Sometimes | Rarely | Never |
|---------------------------------------------------------------------------------------------------------|--------|-----------|--------|-------|
| a. Do you sell or consume milk soon after the cow is treated, without respecting the withdrawal period? |        |           |        |       |

|                                                                                 |  |  |  |  |
|---------------------------------------------------------------------------------|--|--|--|--|
| b. Do you call a veterinarian to get health care service when your cow is sick? |  |  |  |  |
| c. Do you get advice about the withdrawal period after treatment?               |  |  |  |  |
| d. Do you pasteurize milk before selling it?                                    |  |  |  |  |
| e. Do you add antibiotic to the milk after milking?                             |  |  |  |  |
| f. Do you check milk for antibiotic residues before consumption or selling?     |  |  |  |  |
| g. Do you add an antimicrobial to dairy animal feed?                            |  |  |  |  |
